# Supplementary material for: Adiponectin is required for maintaining normal body temperature in a cold environment
Source: Springer Nature journal article supplement (doi:10.1186/s12899-017-0034-7), 2017-10-23
Supplement: MOESM1 [file 15155668]

## Supplemental Fig. 1

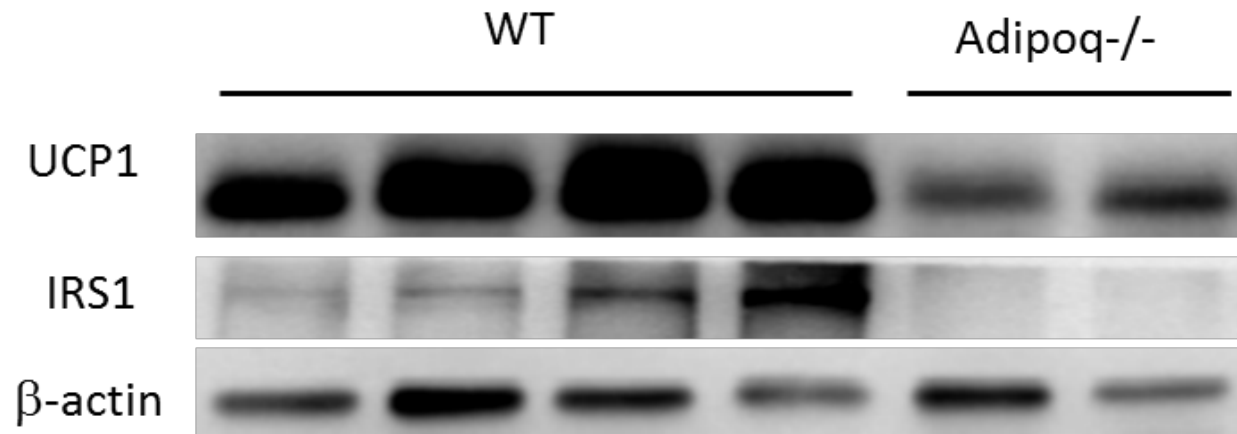

**Supplemental Fig. 1. Adiponectin ablation reduces IRS-1 and UCP1 protein.** BAT from 10-month old WT and *Adipoq*<sup>-/-</sup> mice was collected immediately following a 6 h cold (4°C) exposure. Western blot detection of IRS1 and UCP1.
